# Supplementary material
Source: MDPI journal article supplement (https://www.mdpi.com/2071-1050/16/10/4262)
Supplement: s1 [file s1]

# Student Modeling Packet

*how does a building's roof connect to  
the water cycle?*

Name: -----

Teacher: -----

School: -----

## *How does a building's roof connect to the water cycle?*

Use the box on the following pages to draw a model that shows your understanding of how a building roof connects to the water cycle. Think of everything you have learned about in your classroom that helps you understand these connections.

- Include the most important parts of the system in your drawing
- Label your drawing with words that help us better understand your picture.

Name: \_\_\_\_\_ Date: \_\_\_\_\_

***Model 1:*** How does a building's roof connect to the water cycle?

Please answer questions below after your Model 1 Drawing:

1. My model shows: \_\_\_\_\_

---

---

---

---

2. My roof affects the water cycle because: \_\_\_\_\_

---

---

---

---

and this is important because: \_\_\_\_\_

---

---

---

---

## Prior to doing Model 2 Drawing

Please review your Model 1,

1. What score would you give your Model 1 on a scale from 1 to 10? (where 10 is the best model you can imagine)

\_\_\_\_\_

Why? \_\_\_\_\_

\_\_\_\_\_

\_\_\_\_\_

2. What have you learned about roofs and the water cycle since you drew the Model 1?

\_\_\_\_\_

\_\_\_\_\_

\_\_\_\_\_

\_\_\_\_\_

\_\_\_\_\_

\_\_\_\_\_

Name: \_\_\_\_\_ Date: \_\_\_\_\_

**Model 2:** *How does a building's roof connect to the water cycle?*

Please answer questions below after your Model 2 Drawing:

1. My model shows: \_\_\_\_\_

---

---

---

---

2. My roof affects the water cycle because: \_\_\_\_\_

---

---

---

---

and this is important because: \_\_\_\_\_

---

---

---

---

## Prior to doing Model 3 Drawing

Please review your Model 2,

1. What score would you give your Model 2 on a scale from 1 to 10? (where 10 is the best model you can imagine)

\_\_\_\_\_

Why? \_\_\_\_\_

\_\_\_\_\_

\_\_\_\_\_

2. What have you learned about roofs and the water cycle since you drew the Model 2?

\_\_\_\_\_

\_\_\_\_\_

\_\_\_\_\_

\_\_\_\_\_

\_\_\_\_\_

\_\_\_\_\_



Name: \_\_\_\_\_ Date: \_\_\_\_\_

**Model 3:** *How does a building's roof connect to the water cycle?*

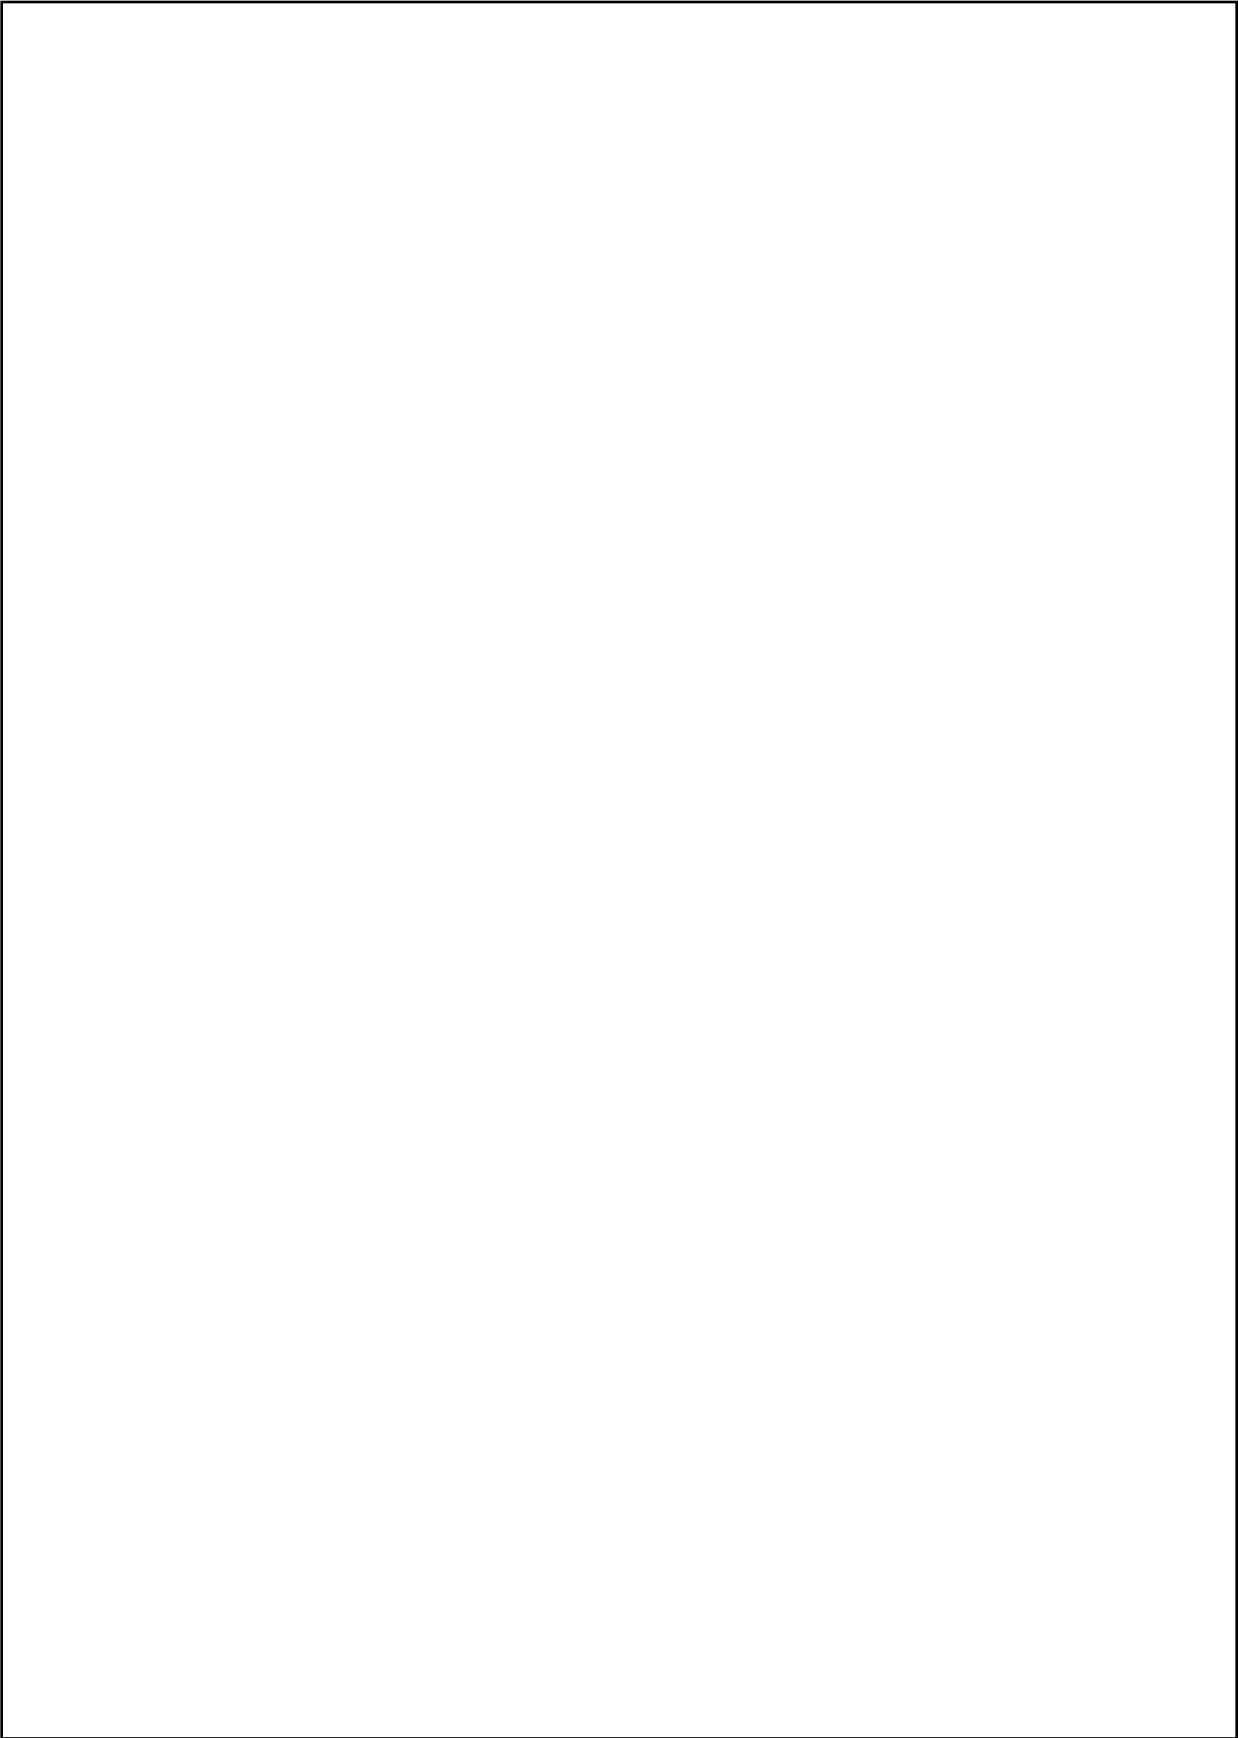

Please answer questions below after your Model 3 Drawing:

1. My model shows: \_\_\_\_\_

---

---

---

---

2. My roof affects the water cycle because: \_\_\_\_\_

---

---

---

---

and this is important because: \_\_\_\_\_

---

---

---

---
